# Supplementary material
Source: PubMed Central journal article supplement (PMC8603429)
Supplement: acm-96-1711-s001.pdf [file acm-96-1711-s001.pdf]

### A Distance-learning Approach to POCUS Training (ADAPT) Template for Monthly Rotation

|             |                                                                                                                                                                                                                                                                                                                                                                                                                                                                                                                                                                                                                                                                                            |
|-------------|--------------------------------------------------------------------------------------------------------------------------------------------------------------------------------------------------------------------------------------------------------------------------------------------------------------------------------------------------------------------------------------------------------------------------------------------------------------------------------------------------------------------------------------------------------------------------------------------------------------------------------------------------------------------------------------------|
| US Rotators | <ol style="list-style-type: none"> <li>1. Scroll down to the day to find links to the pre-work. Complete this prior to the teaching sessions. Set aside 1-2 hours to complete pre-work.</li> <li>2. The link for you to join each day’s zoom chat is populated below.</li> <li>3. You are automatically muted upon joining the chat. Please unmute yourself when speaking. You can also use the chat feature.</li> <li>4. Consider putting on your video. Or at least change your background to a picture.</li> <li>5. Bimonthly office hours for an orientation to the curriculum or any other questions/comments feedback you may have</li> <li>6. Weekly QA session via zoom</li> </ol> |
| US Faculty  | <ol style="list-style-type: none"> <li>1. Scroll down and enter a time for your teaching session.</li> <li>2. Avoid images with any patient identifiers.</li> <li>3. Please encourage the learners to have their handheld devices with them during the learning sessions so they can interact with their probes while you’re teaching.</li> </ol>                                                                                                                                                                                                                                                                                                                                          |

| Sunday | Monday                   | Tuesday              | Wednesday         | Thursday        | Friday        | Saturday |
|--------|--------------------------|----------------------|-------------------|-----------------|---------------|----------|
|        | 1 Physics/eFAST          | 2 Renal              | 3 Echo            | 4 GB            | 5 Aorta/IVC   | 6        |
| 7      | 8 Lung                   | 9 MSK/Soft Tissue    | 10 Echo Pathology | 11 Ocular       | 12 DVT        | 13       |
| 14     | 15 Torsion/Doppler intro | 16 Pelvic US         | 17 Peds Potpourri | 18 Peds GI/Appy | 19 Procedures | 20       |
| 21     | 22 Nerve Blocks          | 23 ENT               | 24 Advanced Echo  | 25 GI - SBO     | 26 OB         | 27       |
| 28     | 29 Critical Care         | 30 Jeopardy / Review |                   |                 |               |          |

| Date                     | Logistics (time in EST)                                                                    | Pre-work links (1-2 hrs of work)                                                                                                                                                                                                                                                                                                                                                                                                                                                                                                                                                                                                                                                                                                                                                                                                                                                                                                                                                                                                                                                                                                                                                                                                                                                                                                    | Learning Objectives / Guide for Faculty                                                                                                                                                                                                                                                                                                                                                                |
|--------------------------|--------------------------------------------------------------------------------------------|-------------------------------------------------------------------------------------------------------------------------------------------------------------------------------------------------------------------------------------------------------------------------------------------------------------------------------------------------------------------------------------------------------------------------------------------------------------------------------------------------------------------------------------------------------------------------------------------------------------------------------------------------------------------------------------------------------------------------------------------------------------------------------------------------------------------------------------------------------------------------------------------------------------------------------------------------------------------------------------------------------------------------------------------------------------------------------------------------------------------------------------------------------------------------------------------------------------------------------------------------------------------------------------------------------------------------------------|--------------------------------------------------------------------------------------------------------------------------------------------------------------------------------------------------------------------------------------------------------------------------------------------------------------------------------------------------------------------------------------------------------|
| 6/1<br>Physics/<br>eFAST | Faculty in charge:<br>Email contact:<br><br>Zoom link:<br>Meeting ID:<br><br>Meeting time: | Physics links:<br>Article 1:<br><a href="https://www.acep.org/sonoguide/physics.html">https://www.acep.org/sonoguide/physics.html</a><br>Video 1: <a href="https://www.youtube.com/watch?v=HcO3SHPgHbY">https://www.youtube.com/watch?v=HcO3SHPgHbY</a><br><br>eFAST links:<br>Article 1: <a href="https://emcrit.org/emcrit/fast-exam/">https://emcrit.org/emcrit/fast-exam/</a><br>Video 1: (navigate all the videos in the link above)<br>Video 2: <a href="https://vimeo.com/34118863">https://vimeo.com/34118863</a>                                                                                                                                                                                                                                                                                                                                                                                                                                                                                                                                                                                                                                                                                                                                                                                                           | <ul style="list-style-type: none"> <li>● US Physics</li> <li>● Knobology</li> <li>● How to perform eFAST exam</li> <li>● Indications/Limitations of eFAST</li> <li>● Identify potential false positive/negatives</li> </ul>                                                                                                                                                                            |
| 6/2<br>Renal             | Faculty in charge:<br>Email contact:<br><br>Zoom link:<br>Meeting ID:<br><br>Meeting time: | Article 1:<br><a href="https://www.acep.org/sonoguide/renal.html">https://www.acep.org/sonoguide/renal.html</a><br>Video 1: <a href="https://www.youtube.com/watch?v=L Ct18pXJreY">https://www.youtube.com/watch?v=L Ct18pXJreY</a><br>Video 2:<br><a href="http://www.ultrasoundpodcast.com/2012/05/episode-27-renal-ultrasound/">http://www.ultrasoundpodcast.com/2012/05/episode-27-renal-ultrasound/</a><br>Video 3: <a href="https://vimeo.com/69556457">https://vimeo.com/69556457</a>                                                                                                                                                                                                                                                                                                                                                                                                                                                                                                                                                                                                                                                                                                                                                                                                                                        | <ul style="list-style-type: none"> <li>● Evaluate renal anatomy</li> <li>● Troubleshoot image orientation/probe movement to obtain desired views</li> <li>● Evaluate for bladder distention, hydronephrosis</li> <li>● Measure a bladder volume</li> </ul>                                                                                                                                             |
| 6/3<br>Echo              | Faculty in charge:<br>Email contact:<br><br>Zoom link:<br>Meeting ID:<br><br>Meeting time: | Article 1:<br><a href="https://www.acep.org/sonoguide/cardiac.html">https://www.acep.org/sonoguide/cardiac.html</a><br>Article 2:<br><a href="https://onlinelibrary.wiley.com/doi/epdf/10.1111/acem.12652">https://onlinelibrary.wiley.com/doi/epdf/10.1111/acem.12652</a><br>Article 3:<br><a href="http://www.sonomojo.org/sono-pro-tip-distinguishing-right-from-left-heart/">http://www.sonomojo.org/sono-pro-tip-distinguishing-right-from-left-heart/</a><br>Podcast 1:<br><a href="http://www.ultrasoundpodcast.com/2018/03/basiccardiac/">http://www.ultrasoundpodcast.com/2018/03/basiccardiac/</a><br>Video 1:<br><a href="https://litfl.com/vanpocus-cardiac-views/">https://litfl.com/vanpocus-cardiac-views/</a><br>Video 2: <a href="https://www.coreultrasound.com/how-to-obtain-cardiac-windows/">https://www.coreultrasound.com/how-to-obtain-cardiac-windows/</a><br>Video 3:<br><a href="https://www.coreultrasound.com/basic-cardiac-function/">https://www.coreultrasound.com/basic-cardiac-function/</a><br>Video 4: <a href="https://vimeo.com/44575412">https://vimeo.com/44575412</a><br><br>*** <a href="http://pie.med.utoronto.ca/TTE/TTE_content/standardViews.html">http://pie.med.utoronto.ca/TTE/TTE_content/standardViews.html</a><br>→ Great site to perform and learn virtual cardiac ultrasound | <ul style="list-style-type: none"> <li>● Indications/limitations of an ED echocardiogram</li> <li>● Identify the 4 views in a focused cardiac exam</li> <li>● Troubleshoot probe positioning and how to obtain the desired views</li> <li>● Basic clinical scenarios and how echo affects management</li> <li>● Pathology (basics): RVD, ejection fraction, pericardial effusion, tamponade</li> </ul> |
| 6/4<br>GB                | Faculty in charge:<br>Email contact:<br><br>Zoom link:<br>Meeting ID:<br><br>Meeting time: | Article 1: (ppt to scroll through)<br><a href="http://www.ucdenver.edu/academics/colleges/medschool/departments/EmergencyMedicine/Sections/ultrasound/education/Documents/Chapter%2015%20RUO%20-%20Flipped.pdf">http://www.ucdenver.edu/academics/colleges/medschool/departments/EmergencyMedicine/Sections/ultrasound/education/Documents/Chapter%2015%20RUO%20-%20Flipped.pdf</a><br>Article 2: (flow chart)<br><a href="https://wikem.org/wiki/File:Biliary_Ultrasound.png">https://wikem.org/wiki/File:Biliary_Ultrasound.png</a><br>Podcast 1:<br><a href="https://www.ultrasoundgel.org/posts/28WCAL-s9k-U9D1e0wygww">https://www.ultrasoundgel.org/posts/28WCAL-s9k-U9D1e0wygww</a><br>Video 1:                                                                                                                                                                                                                                                                                                                                                                                                                                                                                                                                                                                                                              | <ul style="list-style-type: none"> <li>● Understand GB anatomy</li> <li>● Troubleshoot performing the GB exam</li> <li>● Evaluate for stones, sludge, wall thickening, pericholecystic fluid, and common bile duct dilatation</li> <li>● Diagnostic criteria for acute cholecystitis</li> <li>● Interesting cases</li> </ul>                                                                           |

|                           |                                                                                                     |                                                                                                                                                                                                                                                                                                                                                                                                                                                                                                                                                                                                                                                                                                                                                                                                                                                                        |                                                                                                                                                                                                                                                                                                                                                                                                         |
|---------------------------|-----------------------------------------------------------------------------------------------------|------------------------------------------------------------------------------------------------------------------------------------------------------------------------------------------------------------------------------------------------------------------------------------------------------------------------------------------------------------------------------------------------------------------------------------------------------------------------------------------------------------------------------------------------------------------------------------------------------------------------------------------------------------------------------------------------------------------------------------------------------------------------------------------------------------------------------------------------------------------------|---------------------------------------------------------------------------------------------------------------------------------------------------------------------------------------------------------------------------------------------------------------------------------------------------------------------------------------------------------------------------------------------------------|
|                           |                                                                                                     | <p><a href="http://www.ultrasoundpodcast.com/2012/09/episode-35-gallbladder-ultrasound/">http://www.ultrasoundpodcast.com/2012/09/episode-35-gallbladder-ultrasound/</a> (skip to 9:15)<br/>Video 2:<br/><a href="https://www.coreultrasound.com/gallbladder/">https://www.coreultrasound.com/gallbladder/</a><br/>AEUS Biliary: <a href="https://vimeo.com/87759897">https://vimeo.com/87759897</a></p>                                                                                                                                                                                                                                                                                                                                                                                                                                                               |                                                                                                                                                                                                                                                                                                                                                                                                         |
| 6/5<br>Aorta/IVC          | <p>Faculty in charge:<br/>Email contact:</p> <p>Zoom link:<br/>Meeting ID:</p> <p>Meeting time:</p> | <p>Aorta links:<br/>Article 1:<br/><a href="http://www.tamingthesru.com/blog/ultrasound-case-of-the-month/february-2019">http://www.tamingthesru.com/blog/ultrasound-case-of-the-month/february-2019</a><br/>Video 1: <a href="https://www.youtube.com/watch?v=uiTsFtanyzM">https://www.youtube.com/watch?v=uiTsFtanyzM</a><br/>Video 2:<br/><a href="https://www.youtube.com/watch?v=WKnFD6KeO4c">https://www.youtube.com/watch?v=WKnFD6KeO4c</a><br/>Video 3:<br/><a href="https://www.youtube.com/watch?v=4ITq2gyW5Nw">https://www.youtube.com/watch?v=4ITq2gyW5Nw</a></p> <p>IVC links:<br/>Podcast 1:<br/><a href="https://www.ultrasoundgel.org/posts/V1_nSRFBIm8RPZGeW4JbpQ">https://www.ultrasoundgel.org/posts/V1_nSRFBIm8RPZGeW4JbpQ</a><br/>Video 1:<br/><a href="https://www.coreultrasound.com/ivc/">https://www.coreultrasound.com/ivc/</a></p>          | <ul style="list-style-type: none"> <li>● Distinguish the aorta vs IVC</li> <li>● Identify anatomic landmarks</li> <li>● Identify the branches of the aorta</li> <li>● Identify AAA</li> <li>● Evaluate for aortic dissection and limitations of the exam</li> <li>● Evaluate the IVC for collapsibility vs distensibility</li> <li>● Identify potential false positive/negatives of IVC exam</li> </ul> |
| 6/8<br>Lung               | <p>Faculty in charge:<br/>Email contact:</p> <p>Zoom link:<br/>Meeting ID:</p> <p>Meeting time:</p> | <p>Video 1:<br/><a href="https://www.coreultrasound.com/5ms/">https://www.coreultrasound.com/5ms/</a><br/><a href="https://www.youtube.com/watch?v=VzgX9ihnmec">https://www.youtube.com/watch?v=VzgX9ihnmec</a><br/>Video 2:<br/><a href="http://www.ultrasoundpodcast.com/2012/07/episode-31-lung-ultrasound-with-vicki-noble-part-1/">http://www.ultrasoundpodcast.com/2012/07/episode-31-lung-ultrasound-with-vicki-noble-part-1/</a> (skip to 7:30 min mark)<br/>Video 3:<br/><a href="http://www.ultrasoundpodcast.com/2012/07/episode-32-lung-ultrasound-with-vicki-noble-part-2/">http://www.ultrasoundpodcast.com/2012/07/episode-32-lung-ultrasound-with-vicki-noble-part-2/</a></p> <p>Additional helpful links:<br/><a href="http://pie.med.utoronto.ca/POCUS/POCUS_content/lungUS.html">http://pie.med.utoronto.ca/POCUS/POCUS_content/lungUS.html</a></p> | <ul style="list-style-type: none"> <li>● Indications/limitations of a thorax exam</li> <li>● How to perform</li> <li>● Evaluation for pneumothorax, pleural effusion, consolidation, pulmonary edema, viral PNA, etc.</li> </ul>                                                                                                                                                                        |
| 6/9<br>MSK/soft tissue    | <p>Faculty in charge:<br/>Email contact:</p> <p>Zoom link:<br/>Meeting ID:</p> <p>Meeting time:</p> | <p>MSK links:<br/>Article 1: <a href="https://www.acep.org/sonoguide/musculoskeletal.html">https://www.acep.org/sonoguide/musculoskeletal.html</a><br/>Video 1: <a href="https://vimeo.com/41682960">https://vimeo.com/41682960</a></p> <p>Soft tissue links:<br/>Article 1: <a href="https://www.acep.org/sonoguide/soft_tissue.html">https://www.acep.org/sonoguide/soft_tissue.html</a><br/>Article 2: <a href="https://www.acep.org/sonoguide/foreign_bodies.html">https://www.acep.org/sonoguide/foreign_bodies.html</a><br/>Video 1: <a href="https://www.coreultrasound.com/cellulitis-vs-abscess/">https://www.coreultrasound.com/cellulitis-vs-abscess/</a><br/>Video 2:<br/><a href="https://www.coreultrasound.com/nsti/">https://www.coreultrasound.com/nsti/</a></p>                                                                                      | <ul style="list-style-type: none"> <li>● Indications/limitations of the exam</li> <li>● Normal sonographic findings in a soft tissue/msk exam</li> <li>● Evaluate for joint effusions, fractures, tendon pathology, dislocation, abscess, cellulitis, foreign body, nec fasc</li> <li>● How to perform foreign body removal, joint injections</li> </ul>                                                |
| 6/10<br>Echo<br>Pathology | <p>Faculty in charge:<br/>Email contact:</p>                                                        | <p>Article 1: <a href="https://www.ncbi.nlm.nih.gov/pubmed/27793505">https://www.ncbi.nlm.nih.gov/pubmed/27793505</a><br/>Podcast 1:<br/><a href="https://www.ultrasoundpodcast.com/2018/07/when-tamponade-is-tampona">https://www.ultrasoundpodcast.com/2018/07/when-tamponade-is-tampona</a></p>                                                                                                                                                                                                                                                                                                                                                                                                                                                                                                                                                                     | <ul style="list-style-type: none"> <li>● Review of normal 4 views of focused exam</li> <li>● Endocarditis</li> <li>● Right heart strain/TAPSE</li> </ul>                                                                                                                                                                                                                                                |

|                                   |                                                                                                         |                                                                                                                                                                                                                                                                                                                                                                                                                                                                                                                                                                                                                                                                                                                                                                             |                                                                                                                                                                                                                                                                                           |
|-----------------------------------|---------------------------------------------------------------------------------------------------------|-----------------------------------------------------------------------------------------------------------------------------------------------------------------------------------------------------------------------------------------------------------------------------------------------------------------------------------------------------------------------------------------------------------------------------------------------------------------------------------------------------------------------------------------------------------------------------------------------------------------------------------------------------------------------------------------------------------------------------------------------------------------------------|-------------------------------------------------------------------------------------------------------------------------------------------------------------------------------------------------------------------------------------------------------------------------------------------|
|                                   | <p>Zoom link:<br/>Meeting ID:<br/><br/>Meeting time:</p>                                                | <p><a href="#">de/</a><br/>Video 1: <a href="https://www.coreultrasound.com/right-heart-function/">https://www.coreultrasound.com/right-heart-function/</a><br/>Video 2:<br/><a href="https://www.coreultrasound.com/pericardial-tamponade/">https://www.coreultrasound.com/pericardial-tamponade/</a><br/><br/>WMA:<br/>Video 1: <a href="https://www.youtube.com/watch?v=-5a_jgQBFcM">https://www.youtube.com/watch?v=-5a_jgQBFcM</a><br/>Video 2: <a href="https://www.youtube.com/watch?v=AYxqkPsUysE">https://www.youtube.com/watch?v=AYxqkPsUysE</a></p>                                                                                                                                                                                                              | <ul style="list-style-type: none"> <li>● Regional WMA</li> <li>● Tamponade</li> </ul>                                                                                                                                                                                                     |
| 6/11<br>Ocular                    | <p>Faculty in charge:<br/>Email contact:<br/><br/>Zoom link:<br/>Meeting ID:<br/><br/>Meeting time:</p> | <p>Article 1:<br/><a href="https://www.acep.org/sonoguide/smparts_ocular.html">https://www.acep.org/sonoguide/smparts_ocular.html</a><br/>Video 1:<br/><a href="https://www.youtube.com/watch?v=gNLTZipajwM">https://www.youtube.com/watch?v=gNLTZipajwM</a><br/>Video 2:<br/><a href="https://www.youtube.com/watch?v=bf1BjBYGhV4">https://www.youtube.com/watch?v=bf1BjBYGhV4</a><br/>Video 3:<br/><a href="https://www.coreultrasound.com/onsd/">https://www.coreultrasound.com/onsd/</a><br/>Video 4:<br/><a href="https://vimeo.com/41575053">https://vimeo.com/41575053</a></p>                                                                                                                                                                                       | <ul style="list-style-type: none"> <li>● Indications for an ocular exam</li> <li>● Tips and tricks in obtaining the views</li> <li>● Evaluation for retinal detachment, vitreous detachment, vitreous hemorrhage, ONSD</li> </ul>                                                         |
| 6/12<br>DVT                       | <p>Faculty in charge:<br/>Email contact:<br/><br/>Zoom link:<br/>Meeting ID:<br/><br/>Meeting time:</p> | <p>Article 1: <a href="https://www.acep.org/sonoguide/dvt.html">https://www.acep.org/sonoguide/dvt.html</a><br/>Article 2: Adhikari Isolated DVT, Implications for 2 point compression<br/><a href="https://www.annemergmed.com/article/S0196-0644(14)01419-X/fulltext">https://www.annemergmed.com/article/S0196-0644(14)01419-X/fulltext</a><br/>Podcast 1:<br/><a href="https://www.ultrasoundgel.org/posts/ZVHiVPnfPjUyIUgqIxNVA">https://www.ultrasoundgel.org/posts/ZVHiVPnfPjUyIUgqIxNVA</a><br/>Video 1: <a href="https://www.youtube.com/watch?v=57vCNW6AVqU">https://www.youtube.com/watch?v=57vCNW6AVqU</a><br/>Video 2: <a href="https://vimeo.com/52819569">https://vimeo.com/52819569</a></p>                                                                 | <ul style="list-style-type: none"> <li>● How to use POCUS DVT exam clinically</li> <li>● Normal anatomy</li> <li>● Limitations</li> <li>● Evaluation of DVTs</li> </ul>                                                                                                                   |
| 6/15<br>Torsion/<br>Doppler intro | <p>Faculty in charge:<br/>Email contact:<br/><br/>Zoom link:<br/>Meeting ID:<br/><br/>Meeting time:</p> | <p>Ovarian links:<br/>Article 1:<br/><a href="https://coreem.net/core/ovarian-torsion/">https://coreem.net/core/ovarian-torsion/</a><br/>Video 1:<br/><a href="https://www.youtube.com/watch?v=ebpcUIQVmlE&amp;feature=youtu.be">https://www.youtube.com/watch?v=ebpcUIQVmlE&amp;feature=youtu.be</a><br/>Video 2: <a href="https://www.youtube.com/watch?v=RcsJrlksFHg">https://www.youtube.com/watch?v=RcsJrlksFHg</a> (skip to 5:21 min)<br/><br/>Testicular links:<br/>Video 1: <a href="https://www.youtube.com/watch?v=IQ5pUWlu6mI">https://www.youtube.com/watch?v=IQ5pUWlu6mI</a><br/>Video 2:<br/><a href="https://www.youtube.com/watch?v=tO1c5P26fQs">https://www.youtube.com/watch?v=tO1c5P26fQs</a>. (You can skip 2:20-13:20 otherwise, watch all of it.)</p> | <ul style="list-style-type: none"> <li>● Introduction to doppler ultrasound</li> <li>● Normal anatomy of ovaries/testicles</li> <li>● Ovarian torsion</li> <li>● Testicular torsion</li> </ul>                                                                                            |
| 6/16<br>Pelvic US                 | <p>Faculty in charge:<br/>Email contact:<br/><br/>Zoom link:<br/>Meeting ID:</p>                        | <p>Article 1: NEJM Doubilet article <a href="https://escholarship.org/uc/item/3g86q83k">https://escholarship.org/uc/item/3g86q83k</a><br/>Article 2: <a href="https://www.acep.org/sonoguide/obgyn.html">https://www.acep.org/sonoguide/obgyn.html</a><br/>Video 1 - Transab: <a href="https://vimeo.com/41808262">https://vimeo.com/41808262</a><br/>Video 2 - Transvag: <a href="https://vimeo.com/52830902">https://vimeo.com/52830902</a></p>                                                                                                                                                                                                                                                                                                                           | <ul style="list-style-type: none"> <li>● Indications for transabdominal vs transvaginal ultrasound</li> <li>● Normal sonographic findings in pelvic and 1st trimester ob ultrasound</li> <li>● Significance of discriminatory zone, need for ultrasound even with low beta HCG</li> </ul> |

|                           |                                                                                            |                                                                                                                                                                                                                                                                                                                                                                                                                                                                                                                                                                                                                                                                                                                                                                                                                                                                                                                                                                                                                                                |                                                                                                                                                                                                                                                                                                                                                               |
|---------------------------|--------------------------------------------------------------------------------------------|------------------------------------------------------------------------------------------------------------------------------------------------------------------------------------------------------------------------------------------------------------------------------------------------------------------------------------------------------------------------------------------------------------------------------------------------------------------------------------------------------------------------------------------------------------------------------------------------------------------------------------------------------------------------------------------------------------------------------------------------------------------------------------------------------------------------------------------------------------------------------------------------------------------------------------------------------------------------------------------------------------------------------------------------|---------------------------------------------------------------------------------------------------------------------------------------------------------------------------------------------------------------------------------------------------------------------------------------------------------------------------------------------------------------|
|                           | Meeting time:                                                                              |                                                                                                                                                                                                                                                                                                                                                                                                                                                                                                                                                                                                                                                                                                                                                                                                                                                                                                                                                                                                                                                | <ul style="list-style-type: none"> <li>● Identify gestational sac, yolk sac, fetal pole</li> <li>● Measurements of CRL and FHR</li> <li>● Non-obstetric GYN pathology</li> </ul>                                                                                                                                                                              |
| 6/17<br>Peds<br>Potpourri | Faculty in charge:<br>Email contact:<br><br>Zoom link:<br>Meeting ID:<br><br>Meeting time: | <p>Techniques:<br/>Video 1: <a href="https://www.youtube.com/watch?v=XIc_HKgvN2o&amp;t=7s">https://www.youtube.com/watch?v=XIc_HKgvN2o&amp;t=7s</a><br/>Video 2: <a href="https://www.youtube.com/watch?v=fDhNo2f9ols&amp;t=17s">https://www.youtube.com/watch?v=fDhNo2f9ols&amp;t=17s</a><br/>Video 3: <a href="https://www.youtube.com/watch?v=B1ygV3yJhIU">https://www.youtube.com/watch?v=B1ygV3yJhIU</a></p> <p>Applications:<br/>1) <a href="https://www.youtube.com/watch?v=1ifkK7ELXK4&amp;t=301s">https://www.youtube.com/watch?v=1ifkK7ELXK4&amp;t=301s</a><br/>2) <a href="https://www.coreultrasound.com/uotw-89/">https://www.coreultrasound.com/uotw-89/</a><br/>3) <a href="https://blog.5minsono.com/csb-peds-cold/">https://blog.5minsono.com/csb-peds-cold/</a><br/>4) <a href="https://www.coreultrasound.com/uotw-28">https://www.coreultrasound.com/uotw-28</a></p>                                                                                                                                                       | <ul style="list-style-type: none"> <li>● Ultrasound techniques in pediatric population and how adult applications apply to children</li> <li>● Diagnostic management of a limping child</li> <li>● Use of ultrasound in nonaccidental trauma</li> <li>● Pediatric soft tissue evaluation</li> <li>● FoCUS protocol</li> <li>● Pediatric procedures</li> </ul> |
| 6/18<br>Peds GI /<br>Appy | Faculty in charge:<br>Email contact:<br><br>Zoom link:<br>Meeting ID:<br><br>Meeting time: | <p>Appendicitis:<br/>Article: <a href="https://www.annemergmed.com/article/S0196-0644(14)00296-0/fulltext">https://www.annemergmed.com/article/S0196-0644(14)00296-0/fulltext</a><br/>Video 1: <a href="https://www.ultrasoundgel.org/posts/Ur9k1gk0AY97Q01fhsOGxg">https://www.ultrasoundgel.org/posts/Ur9k1gk0AY97Q01fhsOGxg</a><br/>Video 2: <a href="https://vimeo.com/152378669">https://vimeo.com/152378669</a><br/>Video 3: <a href="https://vimeo.com/93051990">https://vimeo.com/93051990</a></p> <p>Intussusception links<br/>Video 1 <a href="https://youtu.be/mlswUT5ZDC4">https://youtu.be/mlswUT5ZDC4</a><br/>Article: <a href="https://doi.org/10.1016/j.jemermed.2019.06.007">10.1016/j.jemermed.2019.06.007</a></p> <p>Pyloric Stenosis links<br/>Video1: <a href="https://youtu.be/kMXprvunX-g">https://youtu.be/kMXprvunX-g</a><br/>Video2: <a href="https://youtu.be/cVzU72tM_wI">https://youtu.be/cVzU72tM_wI</a></p> <p>Article: <a href="https://doi.org/10.1111/acem.12163">https://doi.org/10.1111/acem.12163</a></p> | <ul style="list-style-type: none"> <li>● Normal appendix</li> <li>● Appendicitis</li> <li>● Landmarks and techniques for finding the appendix</li> <li>● Intussusception</li> <li>● Pyloric stenosis</li> </ul>                                                                                                                                               |
| 6/19<br>Procedures        | Faculty in charge:<br>Email contact:<br><br>Zoom link:<br>Meeting ID:<br><br>Meeting time: | <p>Article 1: US Guided LP:<br/><a href="https://www.acepnow.com/article/perform-ultrasound-assisted-lumbar-puncture/">https://www.acepnow.com/article/perform-ultrasound-assisted-lumbar-puncture/</a><br/>Video 1: <a href="https://www.youtube.com/watch?v=rbbpwE_ijm0">https://www.youtube.com/watch?v=rbbpwE_ijm0</a><br/>Podcast 1: US Podcast Pericardiocentesis<br/><a href="https://www.youtube.com/watch?v=M4vHEr25yFk">https://www.youtube.com/watch?v=M4vHEr25yFk</a><br/>Video 2: <a href="https://www.youtube.com/watch?v=9npNQM8ANds">https://www.youtube.com/watch?v=9npNQM8ANds</a><br/>Video 3: <a href="https://vimeo.com/59095992">https://vimeo.com/59095992</a><br/>Video 4: NEJM US Guided Peripheral IVs:<br/><a href="https://www.nejm.org/doi/full/10.1056/NEJMvcm1005951">https://www.nejm.org/doi/full/10.1056/NEJMvcm1005951</a></p>                                                                                                                                                                              | <ul style="list-style-type: none"> <li>● LP</li> <li>● Pericardiocentesis</li> <li>● Thoracentesis</li> <li>● Paracentesis</li> <li>● US Guided Central/Peripheral IVs</li> </ul>                                                                                                                                                                             |
| 6/22<br>Nerve blocks      | Faculty in charge:<br>Email contact:<br><br>Zoom link:<br>Meeting ID:                      | <p>Article 1:<br/><a href="https://www.acepnow.com/article/avoid-these-two-common-femoral-nerve-block-errors/">https://www.acepnow.com/article/avoid-these-two-common-femoral-nerve-block-errors/</a> Nagdev Common Femoral Block Errors<br/>Video 1: <a href="http://5minsono.com/vids/">http://5minsono.com/vids/</a> (scroll down to nerves)<br/>Video 2: <a href="http://www.ultrasoundpodcast.com/tag/nerve-blocks/">http://www.ultrasoundpodcast.com/tag/nerve-blocks/</a></p>                                                                                                                                                                                                                                                                                                                                                                                                                                                                                                                                                           | <ul style="list-style-type: none"> <li>● Basic set up and concepts including LAST</li> <li>● Upper extremity: radial, median, ulnar</li> <li>● Lower extremity: femoral, posterior tibial</li> <li>● More advanced: interscalene, supraclavicular, infraclavicular, fascia iliaca, sciatica</li> </ul>                                                        |

|                          |                                                                                            |                                                                                                                                                                                                                                                                                                                                                                                                                                                                                                                                                                                                                                                                                                                                                                                                                                                                                                                                                                                                      |                                                                                                                                                                                                                                                                             |
|--------------------------|--------------------------------------------------------------------------------------------|------------------------------------------------------------------------------------------------------------------------------------------------------------------------------------------------------------------------------------------------------------------------------------------------------------------------------------------------------------------------------------------------------------------------------------------------------------------------------------------------------------------------------------------------------------------------------------------------------------------------------------------------------------------------------------------------------------------------------------------------------------------------------------------------------------------------------------------------------------------------------------------------------------------------------------------------------------------------------------------------------|-----------------------------------------------------------------------------------------------------------------------------------------------------------------------------------------------------------------------------------------------------------------------------|
|                          | Meeting time:                                                                              | Femoral:<br><a href="https://www.youtube.com/watch?v=5ht_N8j2KL8">https://www.youtube.com/watch?v=5ht_N8j2KL8</a><br>Ulnar/Median:<br><a href="https://www.youtube.com/watch?v=6NKkzs9FA5I">https://www.youtube.com/watch?v=6NKkzs9FA5I</a><br>Radial:<br><a href="https://www.youtube.com/watch?v=rd7KeoP8IHA">https://www.youtube.com/watch?v=rd7KeoP8IHA</a>                                                                                                                                                                                                                                                                                                                                                                                                                                                                                                                                                                                                                                      |                                                                                                                                                                                                                                                                             |
| 6/23<br>ENT              | Faculty in charge:<br>Email contact:<br><br>Zoom link:<br>Meeting ID:<br><br>Meeting time: | PTA:<br>Article: <a href="https://www.acep.org/sonoguide/smparts_ent.html">https://www.acep.org/sonoguide/smparts_ent.html</a><br>Video 1 - MGH PTA: Telescopic Submandibular Technique:<br><a href="https://www.youtube.com/watch?v=FMBERcu6Ykg">https://www.youtube.com/watch?v=FMBERcu6Ykg</a><br>Video 2: <a href="https://www.youtube.com/watch?v=eYjUYx56kUs">https://www.youtube.com/watch?v=eYjUYx56kUs</a><br><br>ETT:<br>Video 1 - AEUS Endotracheal Intubation: <a href="https://vimeo.com/122483333">https://vimeo.com/122483333</a><br>Video 2: <a href="https://www.coreultrasound.com/endotracheal-tube-confirmation/">https://www.coreultrasound.com/endotracheal-tube-confirmation/</a>                                                                                                                                                                                                                                                                                             | <ul style="list-style-type: none"> <li>● Submandibular v intraoral approach to PTA evaluation</li> <li>● Use of ultrasound in endotracheal intubation</li> </ul>                                                                                                            |
| 6/24<br>Advanced<br>Echo | Faculty in charge:<br>Email contact:<br><br>Zoom link:<br>Meeting ID:<br><br>Meeting time: | Article 1 (quick): ACEP - Diastology at the Bedside<br><a href="https://www.acep.org/how-we-serve/sections/emergency-ultrasound/news/march-2020/fellows-section-diastology-at-the-bedside/">https://www.acep.org/how-we-serve/sections/emergency-ultrasound/news/march-2020/fellows-section-diastology-at-the-bedside/</a><br><br>Article 2 (longer): HFpEF: the echocardiographic VALVE protocol for emergency physicians:<br><a href="https://www.ncbi.nlm.nih.gov/pubmed/24368405">https://www.ncbi.nlm.nih.gov/pubmed/24368405</a><br><br>Podcast/Video 1 (quick): <a href="https://www.coreultrasound.com/diastology/">https://www.coreultrasound.com/diastology/</a><br><br>Podcast/Video 2 & 3 (longer)<br><a href="https://www.ultrasoundpodcast.com/2018/11/diastology-part-1/">https://www.ultrasoundpodcast.com/2018/11/diastology-part-1/</a><br><a href="https://www.ultrasoundpodcast.com/2018/11/diastology-part-2/">https://www.ultrasoundpodcast.com/2018/11/diastology-part-2/</a> | <ul style="list-style-type: none"> <li>● Diastology</li> <li>● LVOT VTI</li> <li>● The use of TEE and its views</li> </ul>                                                                                                                                                  |
| 6/25<br>GI - SBO         | Faculty in charge:<br>Email contact:<br><br>Zoom link:<br>Meeting ID:<br><br>Meeting time: | Article 1:<br><a href="https://www.aliem.com/small-bowel-obstruction-diagnosis-ultrasonography/">https://www.aliem.com/small-bowel-obstruction-diagnosis-ultrasonography/</a><br><br>Podcast 1:<br><a href="https://www.ultrasoundgel.org/posts/p2qdSlr2QTN4RCtwO5rvYQ">https://www.ultrasoundgel.org/posts/p2qdSlr2QTN4RCtwO5rvYQ</a><br><br>Video 1:<br><a href="https://www.youtube.com/watch?v=MoZx-EV3Aso">https://www.youtube.com/watch?v=MoZx-EV3Aso</a><br><br>Video 2:<br><a href="https://www.coreultrasound.com/small-bowel-obstruction/">https://www.coreultrasound.com/small-bowel-obstruction/</a><br><br>Video 3: <a href="https://vimeo.com/69551555">https://vimeo.com/69551555</a>                                                                                                                                                                                                                                                                                                 | <ul style="list-style-type: none"> <li>● How to perform a GI evaluation</li> <li>● Diagnostic criteria for SBO</li> <li>● Examples</li> </ul>                                                                                                                               |
| 6/26<br>OB               | Faculty in charge:<br>Email contact:<br><br>Zoom link:<br>Meeting ID:<br><br>Meeting time: | Video 1:<br><a href="http://www.ultrasoundpodcast.com/2014/10/pregnancy-ultrasound-part-1-of-10amed-back-back-basics-cabo-update/">http://www.ultrasoundpodcast.com/2014/10/pregnancy-ultrasound-part-1-of-10amed-back-back-basics-cabo-update/</a> (can skip to 2:30)<br><br>Video 2:<br><a href="http://www.ultrasoundpodcast.com/2014/11/endomyometrial-thickness-measurement-interstitial-ectopic-pregnancy-ultrasoundrel-foamed/">http://www.ultrasoundpodcast.com/2014/11/endomyometrial-thickness-measurement-interstitial-ectopic-pregnancy-ultrasoundrel-foamed/</a> (can replace)                                                                                                                                                                                                                                                                                                                                                                                                          | <ul style="list-style-type: none"> <li>● Overview about obstetric ultrasounds</li> <li>● indications/limitations</li> <li>● Concepts of ALARA</li> <li>● What to look for in the 2nd and 3rd trimester: GA, FHT</li> <li>● Review pelvic US / 1st trimester exam</li> </ul> |

|                       |                                                                                            |                                                                                                                                                                                                                                                                                                                                                                                                                               |                                                                                                                                                                               |
|-----------------------|--------------------------------------------------------------------------------------------|-------------------------------------------------------------------------------------------------------------------------------------------------------------------------------------------------------------------------------------------------------------------------------------------------------------------------------------------------------------------------------------------------------------------------------|-------------------------------------------------------------------------------------------------------------------------------------------------------------------------------|
|                       |                                                                                            | Video 3:<br><a href="http://www.ultrasoundpodcast.com/2014/10/1st-trimester-pregnancy-ultrasound-part-2-ectopic-topics-foamed/">http://www.ultrasoundpodcast.com/2014/10/1st-trimester-pregnancy-ultrasound-part-2-ectopic-topics-foamed/</a> (skip to 1:30)                                                                                                                                                                  |                                                                                                                                                                               |
| 6/29<br>Critical Care | Faculty in charge:<br>Email contact:<br><br>Zoom link:<br>Meeting ID:<br><br>Meeting time: | Article 1:<br><a href="https://www.resuscitationjournal.com/article/S0300-9572(17)30607-X/fulltext">https://www.resuscitationjournal.com/article/S0300-9572(17)30607-X/fulltext</a><br>Article 2: <a href="https://rebelem.com/beyond-acls-pocus-in-cardiac-arrest/">https://rebelem.com/beyond-acls-pocus-in-cardiac-arrest/</a><br>Video 1: <a href="https://vimeo.com/216695713">https://vimeo.com/216695713</a> AEUS RUSH | <ul style="list-style-type: none"> <li>● REASON trial</li> <li>● RUSH exam</li> <li>● Cardiac Arrest</li> <li>● Volume responsiveness</li> <li>● Carotid flow time</li> </ul> |
| 6/30<br>Review        | Faculty in charge:<br>Email contact:<br><br>Zoom link:<br>Meeting ID:<br><br>Meeting time: | Jeopardy / Review. No pre-work                                                                                                                                                                                                                                                                                                                                                                                                |                                                                                                                                                                               |
