# Supplementary material
Source: PubMed Central journal article supplement (PMC8603429)
Supplement: acm-96-1711-s003.pdf [file acm-96-1711-s003.pdf]

# POCUS Distance Learning Program - Learner Survey

Please complete the survey below regarding your point-of-care ultrasound distance learning experience.

Thank you!

Consent: You are invited to participate in a research study about distance education for point-of-care ultrasound. The goal of the research is to ensure best practices, maximize learner and facilitator satisfaction, and to determine if this novel curriculum is effective. Your participation in this research study is voluntary. You may refuse to participate or withdraw at any time prior to submitting the survey. To help protect your confidentiality, the survey is anonymous and will not contain information that will personally identify you. If you have questions regarding this IRB-reviewed research study, contact kahra.nix@emory.edu.

---

In what US region is your department?

- Northeast
- South
- Midwest
- West

---

Learner Type

- 3rd year medical student
- 4th year medical student
- PGY 1 resident
- PGY 2 resident
- PGY 3 resident
- PGY 4 resident
- Fellow
- Advanced practice provider
- Other

---

Other learner type (please do not include any personally identifiable information)

\_\_\_\_\_

---

What prior formal ultrasound education have you had?

- None
- Integrated ultrasound education during medical school curriculum
- Medical student rotation
- Residency rotation

---

Did you also have access to clinical patient scanning during your rotation?

- Yes
- No

---

What opportunities did you have for ultrasound scanning during your rotation (select all that apply)?

- Patient scanning on clinical shifts
- Patient scanning on self-directed dedicated ultrasound scan shifts
- Patient scanning on faculty led dedicated ultrasound scan shifts
- Handheld device(s) for remote scanning at home
- Other
- None

---

Other scanning opportunities (please do not include any personally identifiable information):

\_\_\_\_\_

---

How many weeks did you participate in the distance learning ultrasound curriculum this month?

\_\_\_\_\_

---

Which of the following extra clinical duty requirements did you have during the time of this rotation?

- None
- ED call pool
- Off-service call pool
- Scheduled ED shifts
- Scheduled off-service shifts

---

On average, how many zoom sessions per week were you able to participate in?

\_\_\_\_\_

---

On average, how many hours did you spend on pre-work prior to each scheduled zoom session?

\_\_\_\_\_

---

Which of the following additional learning opportunities did you have access to during this ultrasound rotation?

- QA sessions with faculty educator
- Zoom sessions using handheld device with faculty educator
- Sonosim
- Sonographer technician directed teaching
- EM sono
- Simulation-based teaching
- Other

---

Other additional learning (please do not include any personally identifiable information)

\_\_\_\_\_

---

How many hours per week did you participate in this other ultrasound education (excludes 2 hour zoom teachings and pre-work)?

\_\_\_\_\_

---

Prior to this distance learning ultrasound rotation, how confident did you feel in your ability to ACQUIRE ultrasound images based on point-of-care ultrasound (POCUS) guidelines?

- Not confident
- A little confident
- Somewhat confident
- Very confident

---

Prior to this distance learning ultrasound rotation, how confident did you feel in your ability to INTERPRET ultrasound images based on POCUS guidelines?

- Not confident
- A little confident
- Somewhat confident
- Very confident

---

After this distance learning ultrasound rotation, how confident do you feel in your ability to ACQUIRE ultrasound images based on POCUS guidelines?

- Not confident
- A little confident
- Somewhat confident
- Very confident

---

After this distance learning ultrasound rotation, how confident do you feel in your ability to INTERPRET ultrasound images based on POCUS guidelines?

- Not confident
- A little confident
- Somewhat confident
- Very confident

---

How often did you feel engaged during the zoom sessions?

- Never
- Sometimes
- Usually
- Always

---

What is your overall level of satisfaction with this distance learning ultrasound rotation?

- Very dissatisfied
- Dissatisfied
- Satisfied
- Very satisfied

---

In the future, if institutions are still requiring elective rotations to occur remotely, how likely are you to recommend continued use of this style of ultrasound education?

- Extremely unlikely
- Unlikely
- Neutral
- Likely
- Extremely likely

---

What were the most valuable aspects of this virtual learning model? (please do not include any personally identifiable information)

\_\_\_\_\_

---

How could the virtual learning model be improved? (please do not include any personally identifiable information)

\_\_\_\_\_

---

Additional comments (please do not include any personally identifiable information)

\_\_\_\_\_
