# Supplementary material
Source: PubMed Central journal article supplement (PMC8603429)
Supplement: acm-96-1711-s004.pdf [file acm-96-1711-s004.pdf]

## Supplemental Digital Appendix 4

**Demographic Characteristics of the 109 Learner and Educator Participants of ADAPT Designed as a Substitute for the EM POCUS Rotation During the COVID 19 Pandemic, fifteen American medical institutions participated via virtual platform, April-June 2020.**  
Data extrapolated from daily sign in sheets verified through logs from video conferencing

platform. Asterisk denotes that there were 8 days with unverified sign-in data (1 date in April, 4 in May, and 3 in June). Abbreviations: ADAPT, A Distance-learning Approach to POCUS Training, EM, emergency medicine; POCUS, point-of-care-ultrasound.

|                     | <b>Number</b> |
|---------------------|---------------|
| Sign Ins            | 632           |
| Unique Participants | 108           |
| Participants/day    | 9.72          |
| Institutions        | 15            |
| Educators           | 13            |
| Learners            | 12            |
| Educators           | 30            |
| Faculty             | 24            |
| Fellows             | 6             |
| Learners            | 70            |
| Faculty             | 3             |
| Fellows             | 9             |
| Medical Students    | 3             |
| Residents           | 54            |
| PGY 1               | 45            |
| PGY 2               | 5             |
| PGY 3               | 2             |
| PGY 4               | 2             |
| Sonographer         | 1             |
| Unknown             | 8             |

Supplemental digital content for Nix K, Liu EL, Oh L, Duanmu Y, Fong T, Ashenburg N, Liu RB. A Distance-Learning Approach to Point-of-Care Ultrasound Training (ADAPT): A Multi-Institutional Educational Response During the COVID-19 Pandemic. Acad Med.

|                 |          |
|-----------------|----------|
| Survey Response | 51       |
| Educators       | 22 (73%) |
| Learners        | 29 (41%) |
| Total Dates*    | 65       |
